# Supplementary material
Source: PubMed Central journal article supplement (PMC5510670)

**Figure S1**

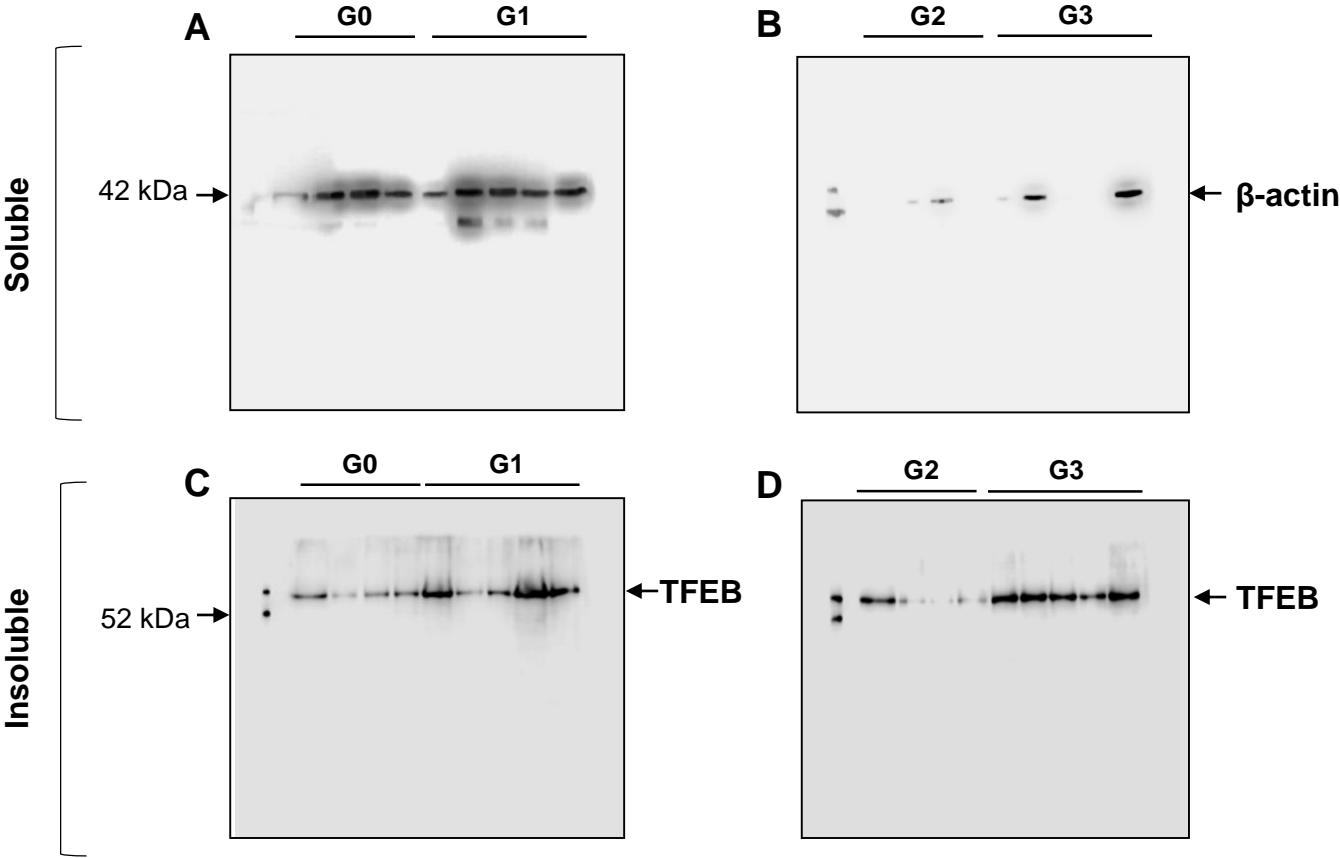

Supplement: Supp_Figure1.pdf [file Supp_Figure1.pdf]

Figure S2

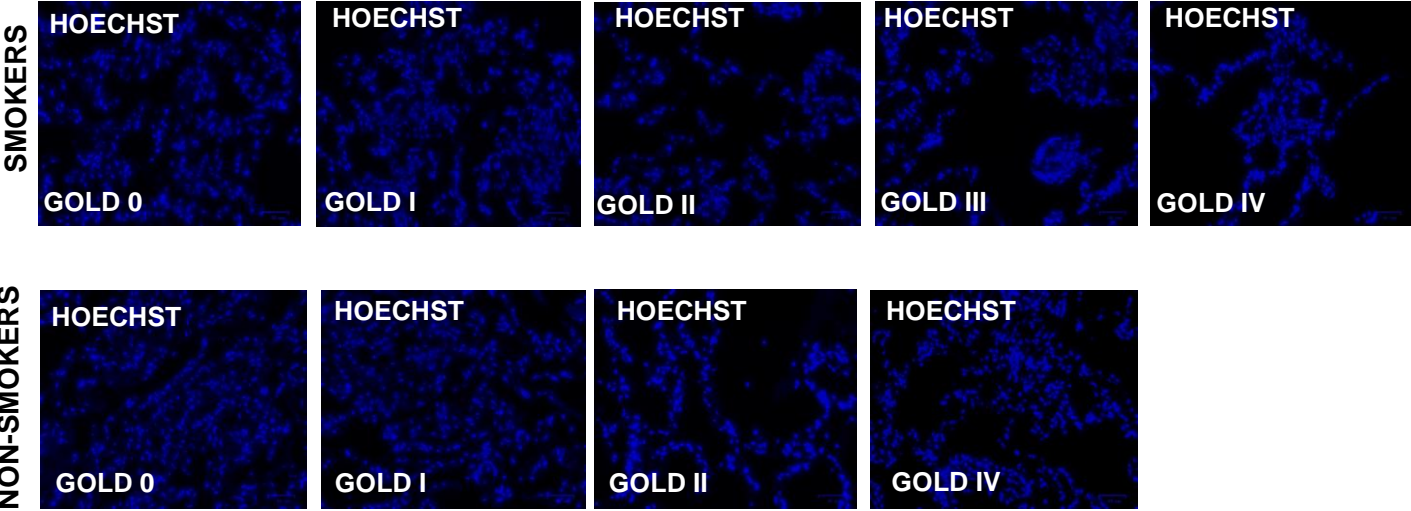

Supplement: Supp_Figure2.pdf [file Supp_Figure2.pdf]

Figure S3

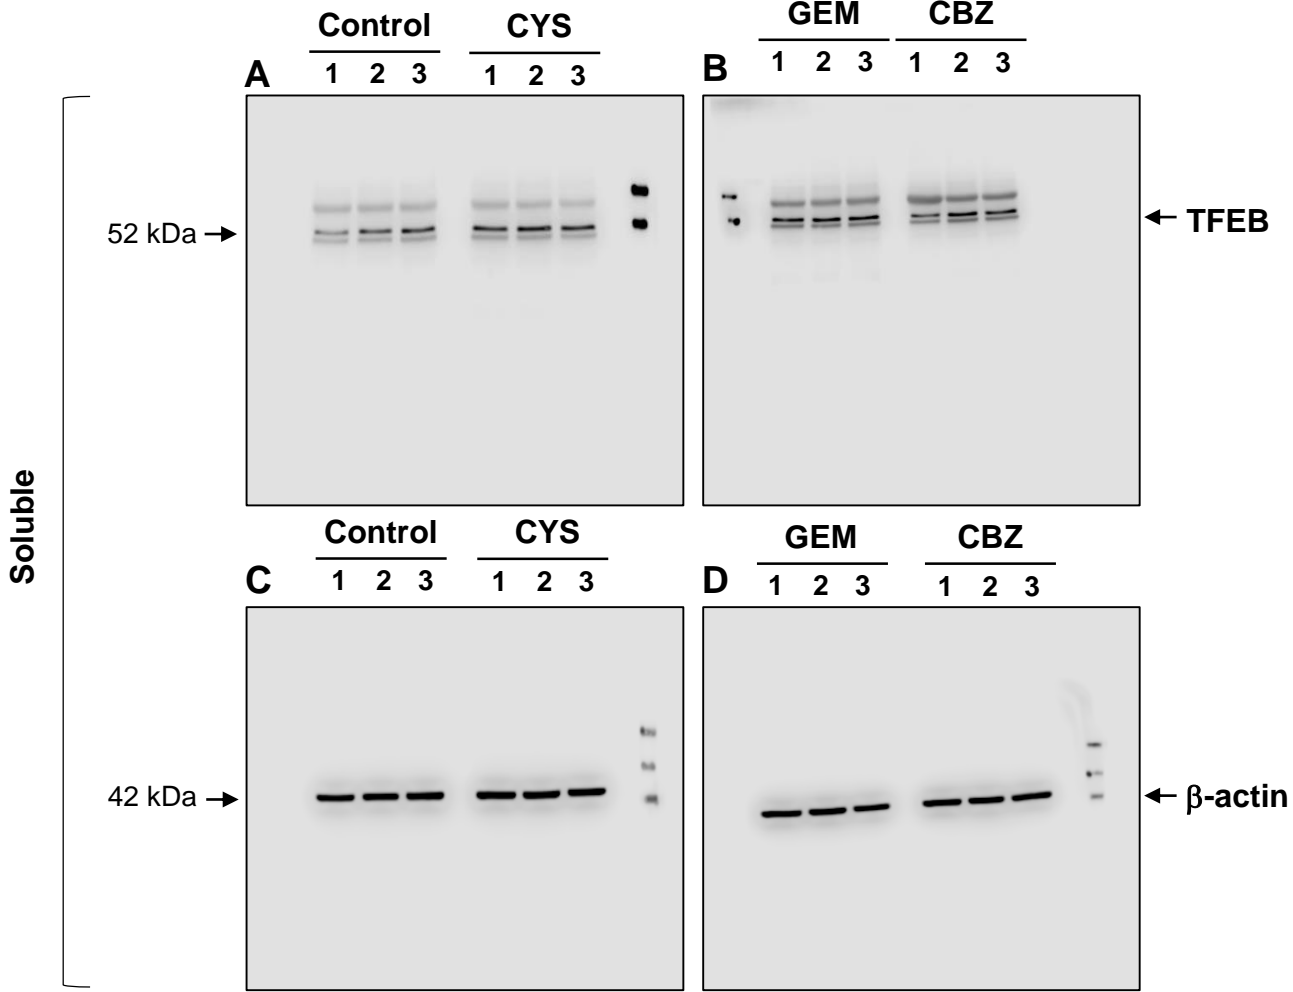

Supplement: Supp_Figure3.pdf [file Supp_Figure3.pdf]

Figure S4

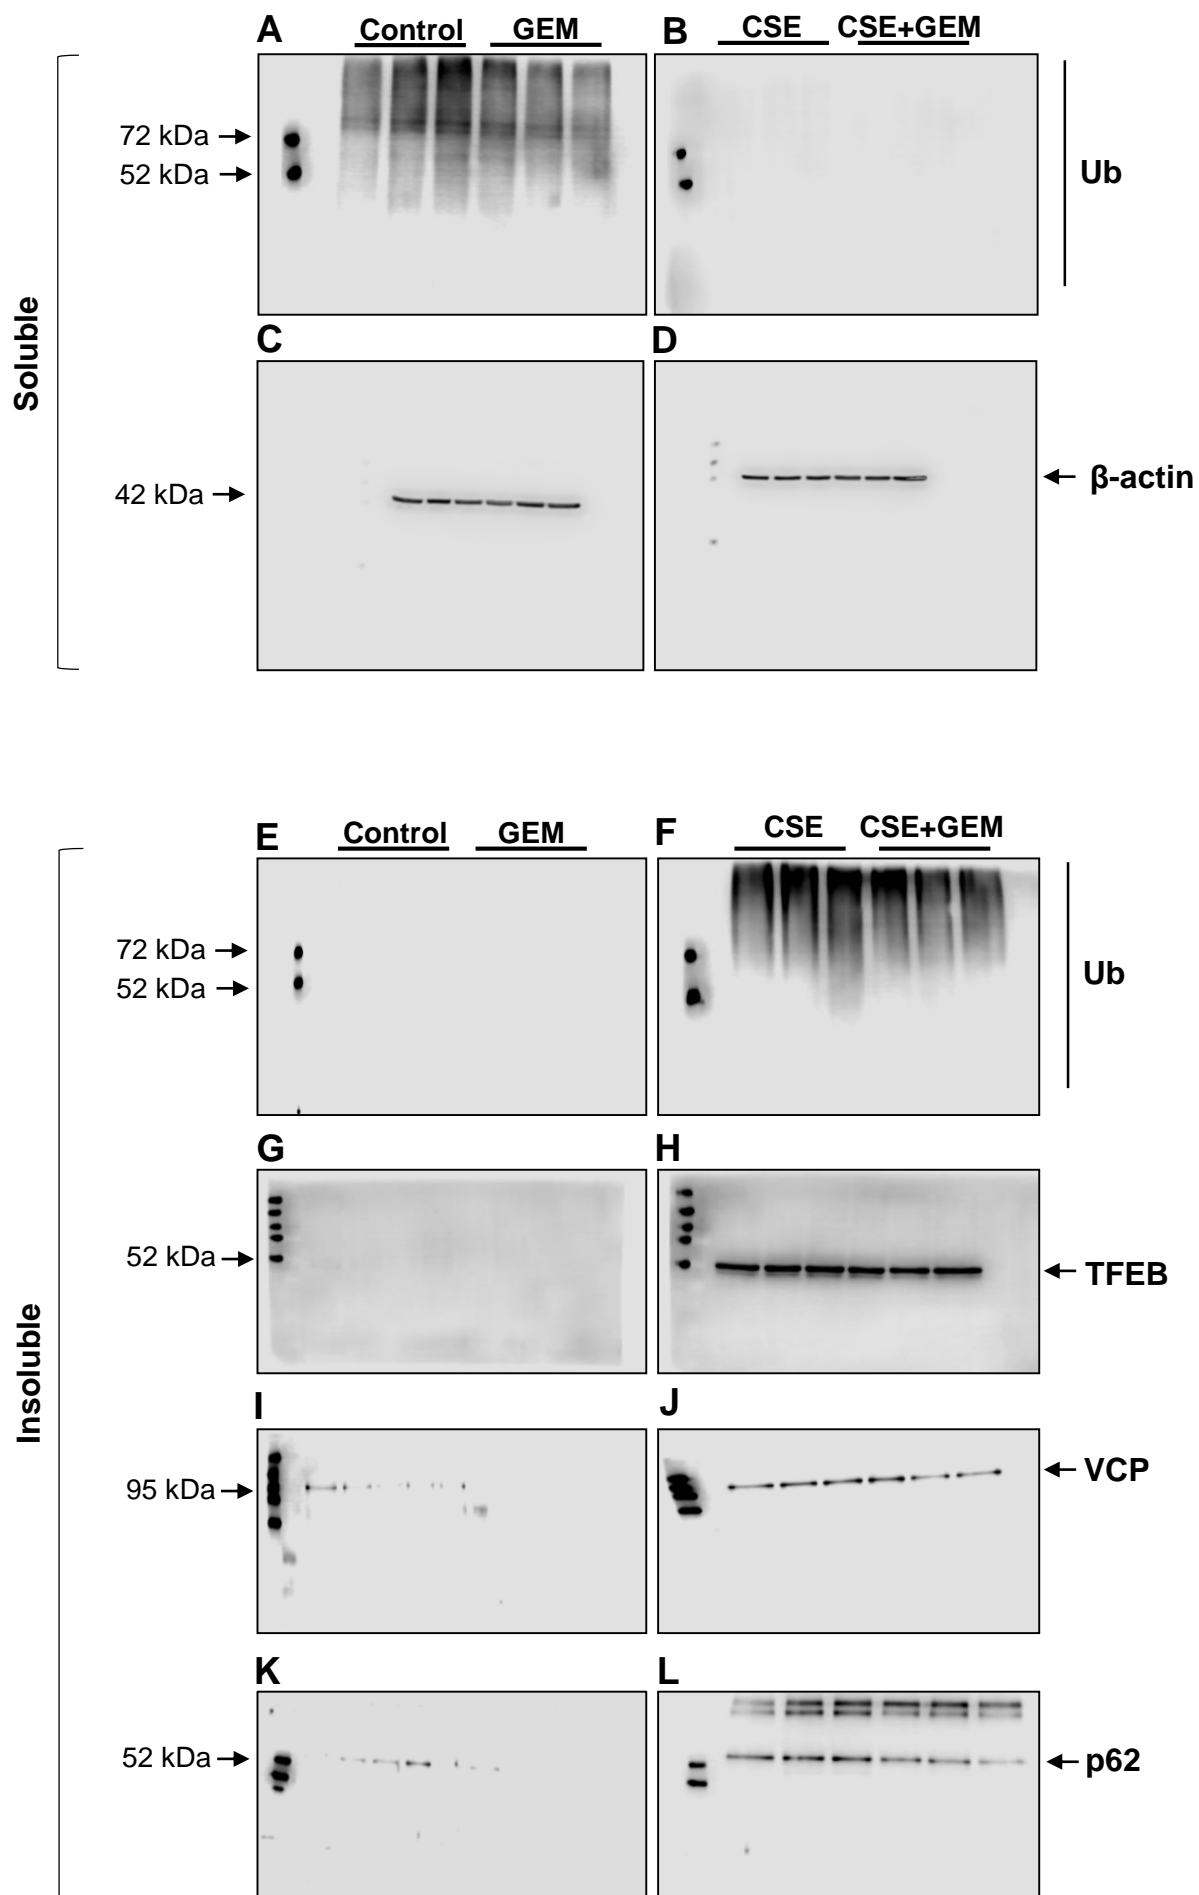

Supplement: Supp_Figure4.pdf [file Supp_Figure4.pdf]

**Figure S5**

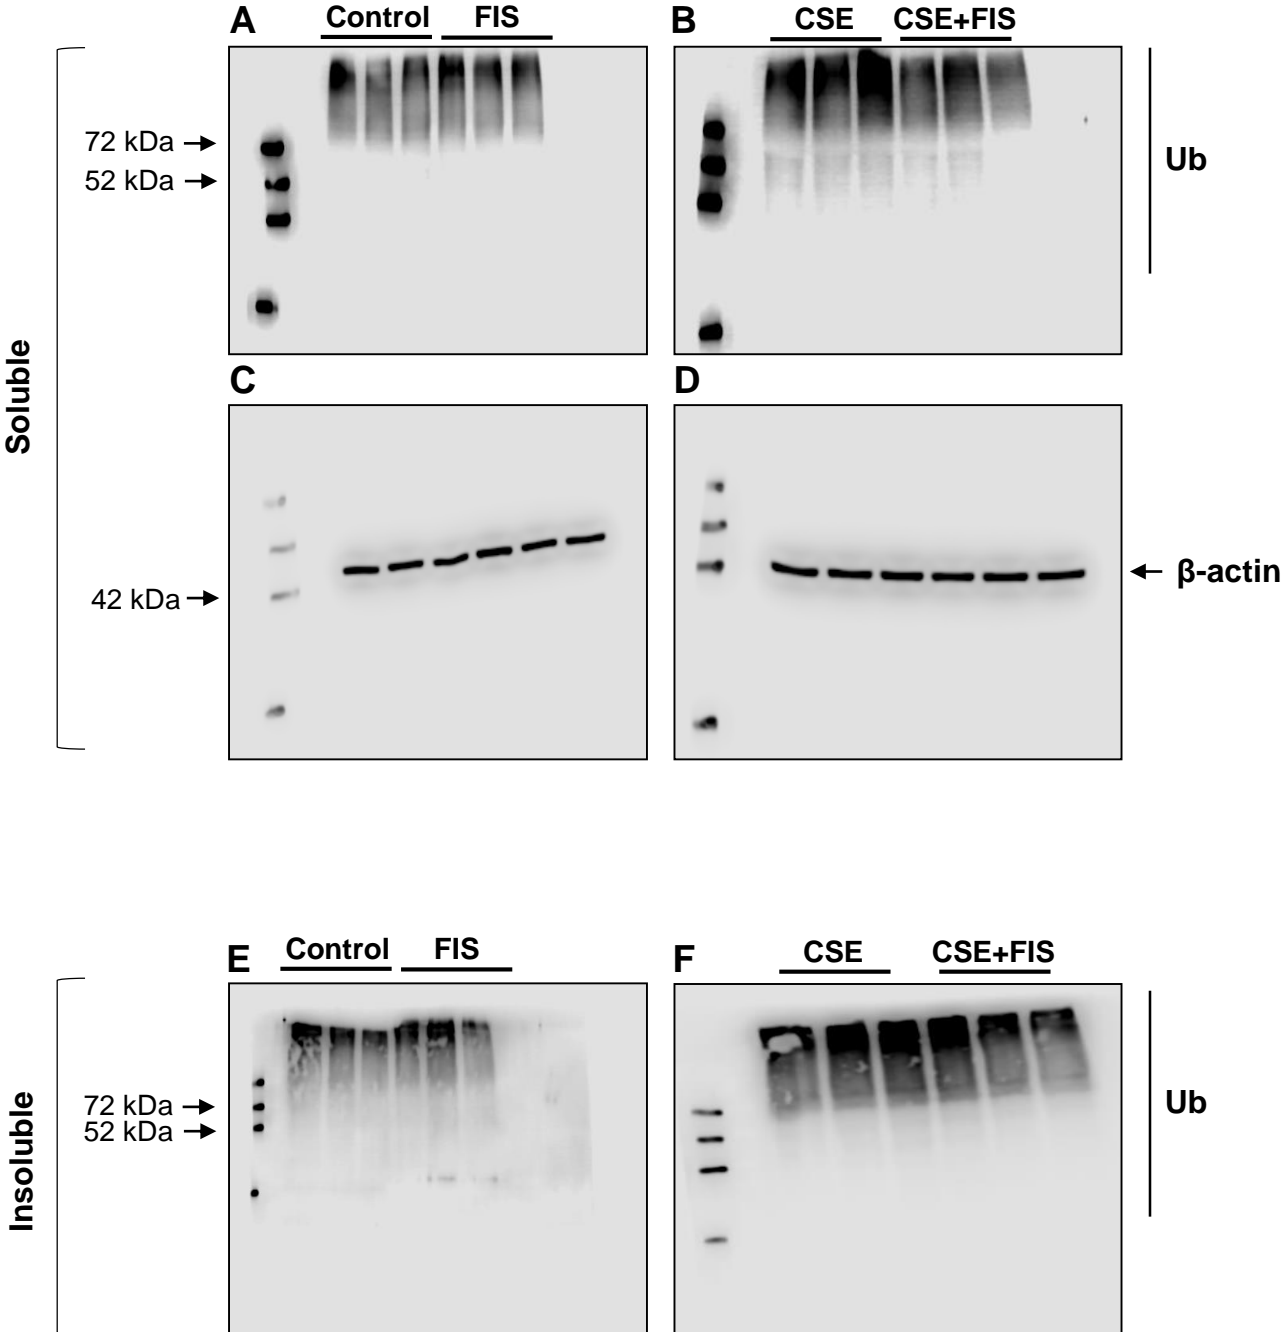

Supplement: Supp_Figure5.pdf [file Supp_Figure5.pdf]

Figure S6

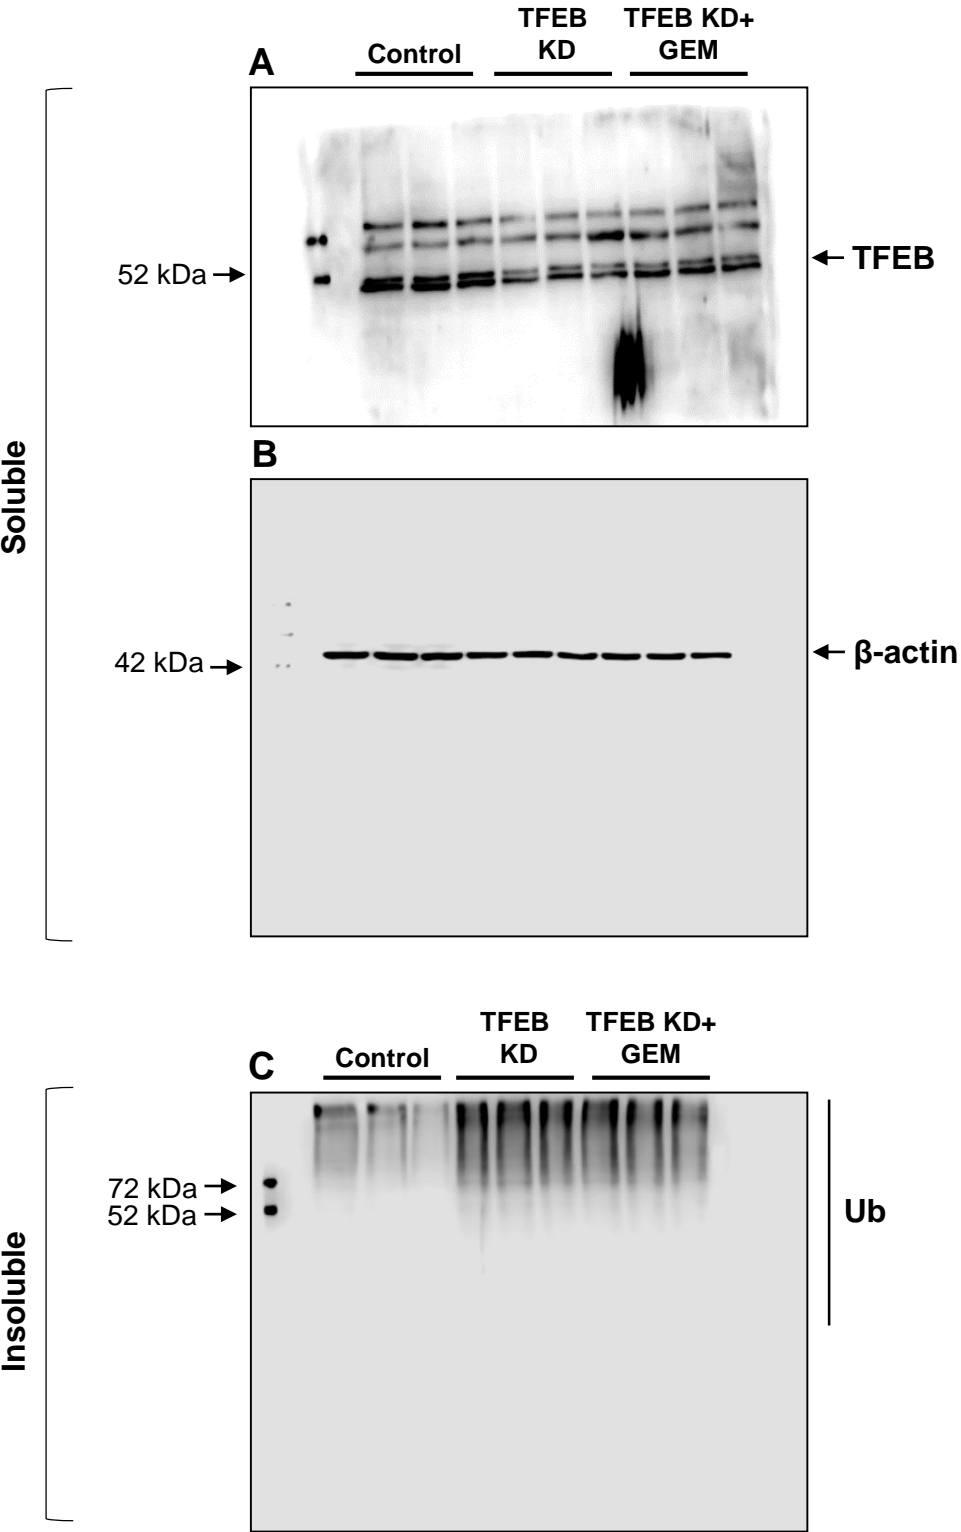

Supplement: Supp_Figure6.pdf [file Supp_Figure6.pdf]

**Figure S7**

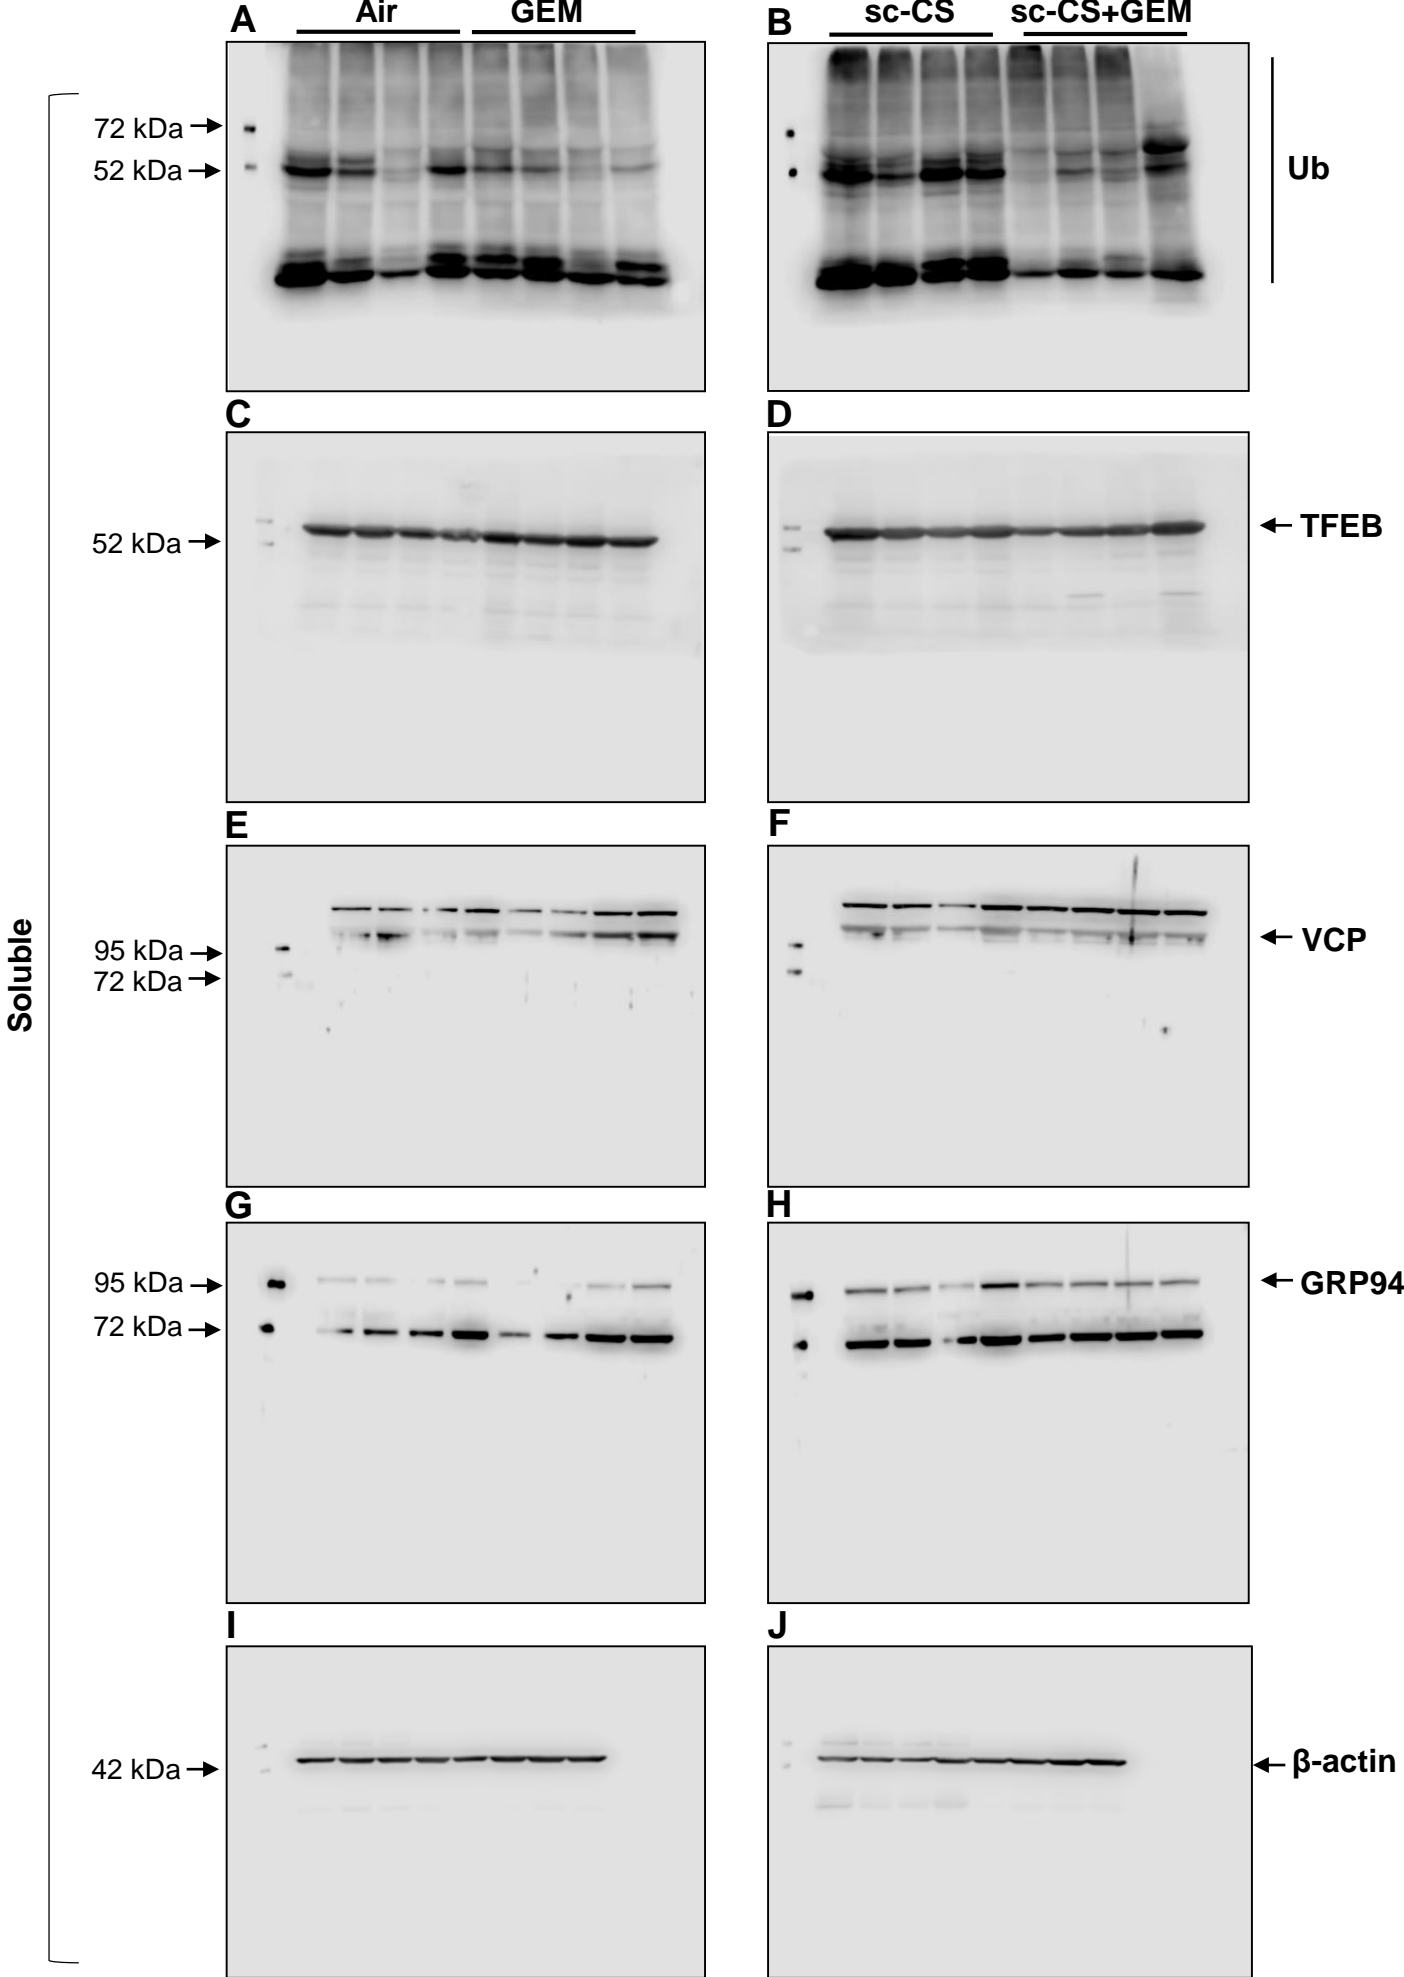

Supplement: Supp_Figure7.pdf [file Supp_Figure7.pdf]

**Figure S8**

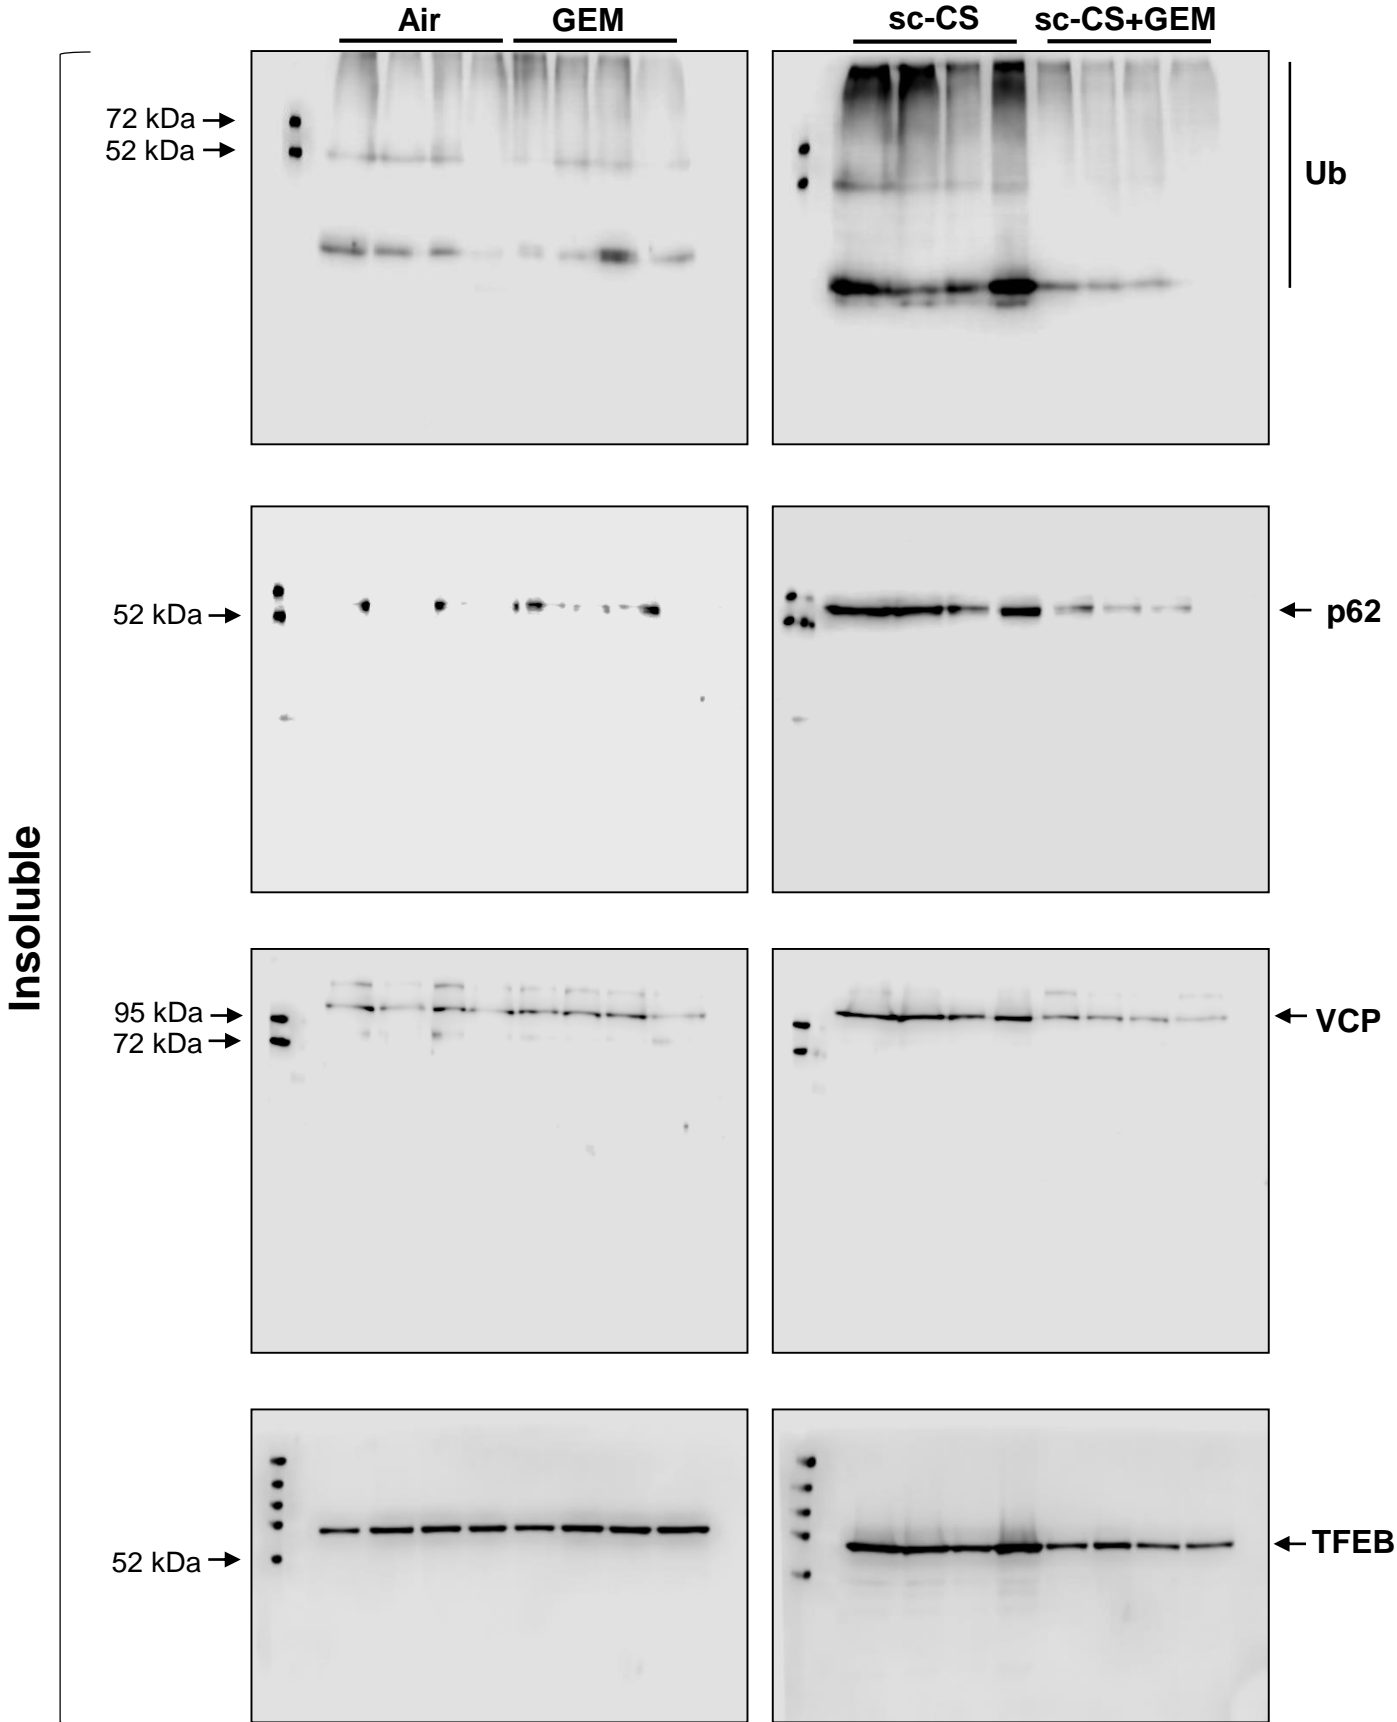

Supplement: Supp_Figure8.pdf [file Supp_Figure8.pdf]
